# Supplementary material for: Lactobacillus acidophilus DDS-1 Modulates the Gut Microbial Co-Occurrence Networks in Aging Mice
Source: MDPI journal article supplement (doi:10.3390/nu14050977), 2022-02-25

## **Lactobacillus acidophilus DDS-1 Modulates Gut Microbial Co-Occurrence Networks in Aging Mice**

Ravichandra Vemuri<sup>1,3</sup> Christopher J. Martoni<sup>2</sup>, Kylie Kavanagh<sup>1,4</sup> and Rajaraman Eri<sup>3</sup>

<sup>1</sup>Department of Pathology, Section on Comparative Medicine, Wake Forest School of Medicine, Medical Center Boulevard, Winston-Salem, NC 27157, USA

<sup>2</sup>UAS Laboratories, Madison, Wisconsin, WI, 54401 USA

<sup>3</sup>College of Health and Medicine, School of Health Sciences, University of Tasmania, Launceston, 7248, TAS, Australia

<sup>4</sup>Department of Biomedicine, University of Tasmania, Hobart, 7000, TAS, Australia

### **Correspondence:**

Ravichandra Vemuri and Rajaraman Eri

Department of Pathology, Section of Comparative Medicine, Wake Forest School of Medicine, Medical Center Boulevard, Winston-Salem, NC 27157, USA.

College of Health and Medicine, School of Health Sciences, University of Tasmania, Launceston, 7248, TAS, Australia

**Table S1:** Nutritional composition details of Barastoc mice standard chow

| Contents                       |                        |
|--------------------------------|------------------------|
| Minimal crude protein 20 %     | Vitamin A 15 IU/g      |
| Minimal crude fat 6 %          | Vitamin D3 2 IU/g      |
| Crude fibre 3.2 %              | Vitamin E 260 mg/kg    |
| Acid detergent fibre 4.4 %     | Vitamin K3 55 mg/kg    |
| Neutral detergent fibre 10.4 % | Vitamin B1 64 mg/kg    |
| Digestible energy 12.8 MJ/kg   | Vitamin B2 48 mg/kg    |
| Calcium 1.14 %                 | Vitamin B6 30 mg/kg    |
| Phosphorus 0.94 %              | Vitamin B12 0.08 mg/kg |
| Sodium 0.35 %                  | Niacin 400 mg/kg       |
| Potassium 0.82 %               | Panto 220 mg/kg        |
| Chloride 0.58 %                | Biotin 1.48 mg/kg      |
| Magnesium 0.24 %               | Folic 11 mg/kg         |
| Lysine 1.11 %                  | Iron 51 mg/kg          |
| Methionine 0.37 %              | Zinc 60 mg/kg          |
| Linoleic 1.52 %                | Manganese 120 mg/kg    |
| Starch 29 %                    | Copper 10 mg/kg        |
| Vitamin A 15 IU/g              | Selenium 0.1 mg/kg     |
| Vitamin D3 2 IU/g              | Molybdenum 0.4 mg/kg   |
| Vitamin E 260 mg/kg            | Cobalt 0.6 mg/kg       |
| Vitamin K3 55 mg/kg            | Iodine 1 .4 mg/kg      |

**Table S2:** Summary of fecal microbiome co-occurrences between young and aging mice at phylum and genus levels based on Kendall's Tau correlation analysis after which FDR ( $q < 0.05$ ) correction was performed.

| Young Control (Phylum) |                 |                      |             | Young Probiotic (Phylum) |                |                      |             |
|------------------------|-----------------|----------------------|-------------|--------------------------|----------------|----------------------|-------------|
| Taxon1                 | Taxon2          | Correlation (p<0.05) | Association | Taxon1                   | Taxon2         | Correlation (p<0.05) | Association |
| Firmicutes             | Cyanobacteria   | 1                    | Positive    | Firmicutes               | Bacteroidetes  | 1                    | Positive    |
| Firmicutes             | Verrucomicrobia | 0.6                  | Positive    | Firmicutes               | Proteobacteria | 0.6                  | Positive    |
| Firmicutes             | Proteobacteria  | 1                    | Positive    | Firmicutes               | Cyanobacteria  | -0.6                 | Negative    |
| Firmicutes             | Bacteroidetes   | -1                   | Negative    | Firmicutes               | Actinobacteria | -0.5                 | Negative    |
| Bacteroidetes          | Cyanobacteria   | -1                   | Negative    | Bacteroidetes            | Proteobacteria | 0.6                  | Positive    |
| Bacteroidetes          | Firmicutes      | -1                   | Negative    | Bacteroidetes            | Cyanobacteria  | 0.5                  | Negative    |
| Bacteroidetes          | Verrucomicrobia | -0.6                 | Negative    | Bacteroidetes            | Actinobacteria | 0.3                  | Negative    |
| Bacteroidetes          | Proteobacteria  | -1                   | Negative    | Bacteroidetes            | Firmicutes     | 1                    | Positive    |
| Verrucomicrobia        | Cyanobacteria   | 0.5                  | Positive    | Verrucomicrobia          | Cyanobacteria  | -0.3                 | Negative    |
| Verrucomicrobia        | Firmicutes      | 0.6                  | Positive    | Verrucomicrobia          | Actinobacteria | -1                   | Negative    |
| Verrucomicrobia        | Proteobacteria  | 0.6                  | Positive    | Proteobacteria           | Firmicutes     | 1                    | Positive    |
| Verrucomicrobia        | Bacteroidetes   | -1                   | Negative    | Proteobacteria           | Bacteroidetes  | 1                    | Positive    |
| Proteobacteria         | Cyanobacteria   | 0.6                  | Positive    | Proteobacteria           | Cyanobacteria  | -1                   | Negative    |
| Proteobacteria         | Firmicutes      | 1                    | Positive    | Proteobacteria           | Actinobacteria | -0.5                 | Negative    |
| Proteobacteria         | Verrucomicrobia | 0.5                  | Positive    | Cyanobacteria            | Firmicutes     | -0.6                 | Negative    |
| Proteobacteria         | Bacteroidetes   | -1                   | Negative    | Cyanobacteria            | Proteobacteria | -0.5                 | Negative    |
| Cyanobacteria          | Firmicutes      | 1                    | Positive    | Cyanobacteria            | Bacteroidetes  | -1                   | Negative    |
| Cyanobacteria          | Proteobacteria  | 0.5                  | Positive    | Cyanobacteria            | Actinobacteria | -0.7                 | Negative    |
| Cyanobacteria          | Bacteroidetes   | -1                   | Negative    | Actinobacteria           | Firmicutes     | -0.5                 | Negative    |

|                              |                 |                                    |                    |                                |                |                                    |                    |
|------------------------------|-----------------|------------------------------------|--------------------|--------------------------------|----------------|------------------------------------|--------------------|
| Cyanobacteria                | Verrucomicrobia | 0.5                                | Positive           | Actinobacteria                 | Proteobacteria | -0.5                               | Negative           |
|                              |                 |                                    |                    | Actinobacteria                 | Bacteroidetes  | -1                                 | Negative           |
|                              |                 |                                    |                    | Actinobacteria                 | Cyanobacteria  | -0.5                               | Negative           |
| <b>Young Control (Genus)</b> |                 |                                    |                    | <b>Young Probiotic (Genus)</b> |                |                                    |                    |
| <b>Taxon1</b>                | <b>Taxon2</b>   | <b>Correlation<br/>(p&lt;0.05)</b> | <b>Association</b> | <b>Taxon1</b>                  | <b>Taxon2</b>  | <b>Correlation<br/>(p&lt;0.05)</b> | <b>Association</b> |
| Prevotella                   | Cyanobacteria   | 1                                  | Positive           | Prevotella                     | Sutterella     | 1                                  | Positive           |
| Prevotella                   | Lachnospira     | 0.6                                | Positive           | Prevotella                     | Ruminococcus   | 0.6                                | Positive           |
| Lachnospira                  | Prevotella      | 0.6                                | Positive           | Lachnospira                    | Lactobacillus  | 1                                  | Positive           |
| Lachnospira                  | Cyanobacteria   | 0.3                                | Positive           | Lachnospira                    | Ruminococcus   | 0.6                                | Positive           |
| Lachnospira                  | Ruminococcus    | -0.5                               | Negative           | Lachnospira                    | Sutterella     | -1                                 | Negative           |
| Lachnospira                  | Rikenella       | 1                                  | Positive           | Lachnospira                    | Oscillospira   | 0.5                                | Positive           |
| Lachnospira                  | Oscillospira    | 0.5                                | Positive           | Lactobacillus                  | Lachnospira    | 1                                  | Positive           |
| Ruminococcus                 | Lachnospira     | -1                                 | Negative           | Lactobacillus                  | Ruminococcus   | 0.6                                | Positive           |
| Ruminococcus                 | Oscillospira    | -0.5                               | Negative           | Lactobacillus                  | Sutterella     | -1                                 | Negative           |
| Ruminococcus                 | Cyanobacteria   | -0.3                               | Negative           | Lactobacillus                  | Oscillospira   | 0.3                                | Positive           |
| Cyanobacteria                | Oscillospira    | 0.6                                | Positive           | Ruminococcus                   | Prevotella     | 0.6                                | Positive           |
| Cyanobacteria                | Rikenella       | 0.5                                | Positive           | Ruminococcus                   | Lachnospira    | 0.6                                | Positive           |
| Cyanobacteria                | Ruminococcus    | -0.3                               | Negative           | Ruminococcus                   | Lactobacillus  | 0.6                                | Positive           |
| Cyanobacteria                | Lachnospira     | 0.3                                | Positive           | Ruminococcus                   | Sutterella     | -0.6                               | Negative           |
| Cyanobacteria                | Oscillospira    | 1                                  | Positive           | Ruminococcus                   | Bacteroides    | 0.3                                | Positive           |
| Cyanobacteria                | Prevotella      | 1                                  | Positive           | Sutterella                     | Ruminococcus   | -0.6                               | Negative           |
| Rikenella                    | Cyanobacteria   | 0.5                                | Positive           | Sutterella                     | Lactobacillus  | -1                                 | Negative           |
| Rikenella                    | Lachnospira     | 1                                  | Positive           | Sutterella                     | Prevotella     | 1                                  | Positive           |
| Oscillospira                 | Lachnospira     | 0.5                                | Positive           | Sutterella                     | Lachnospira    | 0.5                                | Positive           |
| Oscillospira                 | Cyanobacteria   | 0.6                                | Positive           | Sutterella                     | Bacteroides    | -1                                 | Negative           |
| Oscillospira                 | Ruminococcus    | -0.5                               | Negative           | Sutterella                     | Oscillospira   | -0.5                               | Negative           |
|                              |                 |                                    |                    | Bacteroides                    | 0.3            | Ruminococcus                       | Positive           |
|                              |                 |                                    |                    | Bacteroides                    | -1             | Sutterella                         | Negative           |
|                              |                 |                                    |                    | Oscillospira                   | Sutterella     | -0.5                               | Negative           |

|                               |                 |                                    |                    |                                 |                 |                                    |                    |
|-------------------------------|-----------------|------------------------------------|--------------------|---------------------------------|-----------------|------------------------------------|--------------------|
|                               |                 |                                    |                    | Oscillospira                    | Lactobacillus   | 0.3                                | Positive           |
|                               |                 |                                    |                    | Oscillospira                    | Lachnospira     | 0.5                                | Positive           |
|                               |                 |                                    |                    | Oscillospira                    | Ruminococcus    | 0.3                                | Positive           |
| <b>Aging Control (Phylum)</b> |                 |                                    |                    | <b>Aging Probiotic (Phylum)</b> |                 |                                    |                    |
| <b>Taxon1</b>                 | <b>Taxon2</b>   | <b>Correlation<br/>(p&lt;0.05)</b> | <b>Association</b> | <b>Taxon1</b>                   | <b>Taxon2</b>   | <b>Correlation<br/>(p&lt;0.05)</b> | <b>Association</b> |
| Firmicutes                    | Proteobacteria  | -0.5                               | Negative           | Firmicutes                      | Actinobacteria  | 0.3                                | Positive           |
| Firmicutes                    | Bacteroidetes   | -1                                 | Negative           | Firmicutes                      | Proteobacteria  | -0.3                               | Negative           |
| Firmicutes                    | Verrucomicrobia | -0.3                               | Negative           | Firmicutes                      | Bacteroidetes   | -1                                 | Negative           |
| Bacteroidetes                 | Firmicutes      | -1                                 | Negative           | Firmicutes                      | Verrucomicrobia | -0.5                               | Negative           |
| Bacteroidetes                 | Verrucomicrobia | 0.5                                | Positive           | Bacteroidetes                   | Firmicutes      | -1                                 | Negative           |
| Bacteroidetes                 | Proteobacteria  | 0.3                                | Positive           | Bacteroidetes                   | Verrucomicrobia | 0.3                                | Positive           |
| Verrucomicrobia               | Firmicutes      | -0.3                               | Negative           | Bacteroidetes                   | Proteobacteria  | 0.5                                | Positive           |
| Verrucomicrobia               | Bacteroidetes   | 0.5                                | Positive           | Bacteroidetes                   | Actinobacteria  | -0.3                               | Negative           |
| Proteobacteria                | Bacteroidetes   | 0.3                                | Positive           | Proteobacteria                  | Firmicutes      | -0.3                               | Negative           |
| Proteobacteria                | Firmicutes      | -0.5                               | Negative           | Proteobacteria                  | Bacteroidetes   | 0.5                                | Positive           |
|                               |                 |                                    |                    | Proteobacteria                  | Actinobacteria  | -0.3                               | Negative           |
|                               |                 |                                    |                    | Verrucomicrobia                 | Bacteroidetes   | 0.3                                | Positive           |
|                               |                 |                                    |                    | Verrucomicrobia                 | Firmicutes      | -0.5                               | Negative           |
|                               |                 |                                    |                    | Verrucomicrobia                 | Actinobacteria  | -0.3                               | Negative           |
|                               |                 |                                    |                    | Actinobacteria                  | Verrucomicrobia | -0.3                               | Negative           |
|                               |                 |                                    |                    | Actinobacteria                  | Bacteroidetes   | -0.3                               | Negative           |
|                               |                 |                                    |                    | Actinobacteria                  | Firmicutes      | 0.3                                | Positive           |
|                               |                 |                                    |                    | Actinobacteria                  | Proteobacteria  | -0.3                               | Negative           |
| <b>Aging Control (Genus)</b>  |                 |                                    |                    | <b>Aging Probiotic (Genus)</b>  |                 |                                    |                    |

| Taxon1        | Taxon2        | Correlation<br>(p<0.05) | Association | Taxon1        | Taxon2        | Correlation<br>(p<0.05) | Association |
|---------------|---------------|-------------------------|-------------|---------------|---------------|-------------------------|-------------|
| Prevotella    | Cyanobacteria | 0.5                     | Positive    | Prevotella    | Akkermansia   | 0.6                     | Positive    |
| Prevotella    | Ruminococcus  | -0.3                    | Negative    | Prevotella    | Bacteroides   | -0.3                    | Negative    |
| Prevotella    | Oscillospira  | -1                      | Negative    | Prevotella    | Lactobacillus | -1                      | Negative    |
| Cyanobacteria | Prevotella    | 0.5                     | Positive    | Prevotella    | Oscillospira  | -0.5                    | Negative    |
| Cyanobacteria | Ruminococcus  | -0.5                    | Negative    | Akkermansia   | Prevotella    | 0.6                     | Positive    |
| Cyanobacteria | Oscillospira  | -1                      | Negative    | Akkermansia   | Bacteroides   | -0.5                    | Negative    |
| Cyanobacteria | Sutterella    | -0.5                    | Negative    | Akkermansia   | Lactobacillus | -1                      | Negative    |
| Ruminococcus  | Prevotella    | -0.3                    | Negative    | Akkermansia   | Oscillospira  | -0.6                    | Negative    |
| Ruminococcus  | Cyanobacteria | -0.5                    | Negative    | Akkermansia   | Sutterella    | 1                       | Positive    |
| Ruminococcus  | Sutterella    | 1                       | Positive    | Lactobacillus | Prevotella    | -1                      | Negative    |
| Oscillospira  | Prevotella    | -1                      | Negative    | Lactobacillus | Akkermansia   | -1                      | Negative    |
| Oscillospira  | Cyanobacteria | -1                      | Negative    | Lactobacillus | Sutterella    | 1                       | Positive    |
| Oscillospira  | Lachnospira   | 1                       | Positive    | Lactobacillus | Oscillospira  | 0.6                     | Positive    |
| Lachnospira   | Oscillospira  | 1                       | Positive    | Lactobacillus | Lachnospira   | 1                       | Positive    |
|               |               |                         |             | Sutterella    | Lactobacillus | 1                       | Positive    |
|               |               |                         |             | Sutterella    | Akkermansia   | 1                       | Positive    |
|               |               |                         |             | Sutterella    | Bacteroides   | 0.6                     | Positive    |
|               |               |                         |             | Sutterella    | Oscillospira  | -1                      | Negative    |
|               |               |                         |             | Sutterella    | Ruminococcus  | 0.5                     | Positive    |
|               |               |                         |             | Sutterella    | Lactobacillus | 1                       | Positive    |
|               |               |                         |             | Lachnospira   | Lactobacillus | 1                       | Positive    |
|               |               |                         |             | Lachnospira   | Bacteroides   | 0.6                     | Positive    |
|               |               |                         |             | Lachnospira   | Sutterella    | 1                       | Positive    |
|               |               |                         |             | Lachnospira   | Ruminococcus  | -0.5                    | Negative    |
|               |               |                         |             | Lachnospira   | Oscillospira  | 1                       | Positive    |
|               |               |                         |             | Oscillospira  | Lachnospira   | 1                       | Positive    |
|               |               |                         |             | Oscillospira  | Sutterella    | -1                      | Negative    |
|               |               |                         |             | Oscillospira  | Lactobacillus | 0.6                     | Positive    |
|               |               |                         |             | Oscillospira  | Bacteroides   | -0.4                    | Negative    |

|  |  |  |  |              |              |      |          |
|--|--|--|--|--------------|--------------|------|----------|
|  |  |  |  | Bacteroides  | Oscillospira | -0.4 | Negative |
|  |  |  |  | Bacteroides  | Lachnospira  | 0.6  | Positive |
|  |  |  |  | Bacteroides  | Sutterella   | 0.6  | Positive |
|  |  |  |  | Bacteroides  | Ruminococcus | 0.5  | Positive |
|  |  |  |  | Bacteroides  | Akkermansia  | -0.5 | Negative |
|  |  |  |  | Bacteroides  | Prevotella   | -0.3 | Negative |
|  |  |  |  | Rikenella    | Akkermansia  | -0.6 | Negative |
|  |  |  |  | Rikenella    | Sutterella   | -1   | Negative |
|  |  |  |  | Ruminococcus | Lachnospira  | -0.5 | Negative |
|  |  |  |  | Ruminococcus | Sutterella   | 0.5  | Positive |
|  |  |  |  | Ruminococcus | Bacteroides  | 0.5  | Positive |

**Table S3:** Summary of mucosal microbiome co-occurrences between young and aging mice at phylum and genus levels based on Kendall's Tau correlation analysis after which FDR ( $q < 0.05$ ) correction was performed.

| Young Control (Phylum) |                 |                      |             | Young Probiotic (Phylum) |                 |                      |             |
|------------------------|-----------------|----------------------|-------------|--------------------------|-----------------|----------------------|-------------|
| Taxon1                 | Taxon2          | Correlation (p<0.05) | Association | Taxon1                   | Taxon2          | Correlation (p<0.05) | Association |
| Firmicutes             | Bacteroidetes   | 1                    | Positive    | Firmicutes               | Bacteroidetes   | 1                    | Positive    |
| Firmicutes             | Proteobacteria  | -0.2                 | Negative    | Firmicutes               | Cyanobacteria   | -0.5                 | Negative    |
| Firmicutes             | Cyanobacteria   | -0.2                 | Negative    | Firmicutes               | Actinobacteria  | -0.3                 | Negative    |
| Firmicutes             | Actinobacteria  | -0.3                 | Negative    | Bacteroidetes            | Firmicutes      | 1                    | Positive    |
| Bacteroidetes          | Firmicutes      | 1                    | Positive    | Bacteroidetes            | Cyanobacteria   | -0.5                 | Negative    |
| Bacteroidetes          | Proteobacteria  | -0.3                 | Negative    | Bacteroidetes            | Actinobacteria  | -0.5                 | Negative    |
| Bacteroidetes          | Cyanobacteria   | -0.2                 | Negative    | Actinobacteria           | Bacteroidetes   | -0.5                 | Negative    |
| Bacteroidetes          | Actinobacteria  | -0.2                 | Negative    | Actinobacteria           | Firmicutes      | -0.3                 | Negative    |
| Proteobacteria         | Firmicutes      | -1                   | Negative    | Actinobacteria           | Proteobacteria  | -0.5                 | Negative    |
| Proteobacteria         | Bacteroidetes   | -1                   | Negative    | Actinobacteria           | Verrucomicrobia | -0.3                 | Negative    |
| Proteobacteria         | Verrucomicrobia | -0.5                 | Negative    | Cyanobacteria            | Firmicutes      | -0.5                 | Negative    |
| Verrucomicrobia        | Proteobacteria  | -0.5                 | Negative    | Cyanobacteria            | Bacteroidetes   | -0.5                 | Negative    |
| Verrucomicrobia        | Cyanobacteria   | -0.3                 | Negative    | Cyanobacteria            | Verrucomicrobia | -0.3                 | Negative    |
| Verrucomicrobia        | Actinobacteria  | -0.3                 | Negative    | Cyanobacteria            | Proteobacteria  | -0.3                 | Negative    |
| Cyanobacteria          | Firmicutes      | -0.2                 | Negative    | Proteobacteria           | Cyanobacteria   | -0.3                 | Negative    |
| Cyanobacteria          | Verrucomicrobia | -0.3                 | Negative    | Proteobacteria           | Actinobacteria  | -0.5                 | Negative    |
| Cyanobacteria          | Bacteroidetes   | -0.2                 | Negative    | Proteobacteria           | Verrucomicrobia | -0.5                 | Negative    |
| Actinobacteria         | Verrucomicrobia | -0.3                 | Negative    | Verrucomicrobia          | Proteobacteria  | -0.5                 | Negative    |
| Actinobacteria         | Bacteroidetes   | -0.2                 | Negative    | Verrucomicrobia          | Cyanobacteria   | -0.3                 | Negative    |
| Actinobacteria         | Firmicutes      | -0.3                 | Negative    | Verrucomicrobia          | Actinobacteria  | -0.3                 | Negative    |



| Young Control (Genus) |              |                      |             | Young Probiotic (Genus) |              |                      |             |
|-----------------------|--------------|----------------------|-------------|-------------------------|--------------|----------------------|-------------|
| Taxon1                | Taxon2       | Correlation (p<0.05) | Association | Taxon1                  | Taxon2       | Correlation (p<0.05) | Association |
| Prevotella            | Rikenella    | 0.6                  | Positive    | Prevotella              | Rikenella    | -1                   | Negative    |
| Prevotella            | Odoribacter  | -0.3                 | Negative    | Prevotella              | Oscillospira | 0.6                  | Positive    |
| Prevotella            | Ruminococcus | -0.5                 | Negative    | Prevotella              | Ruminococcus | -0.5                 | Negative    |
| Prevotella            | Akkermansia  | -0.3                 | Negative    | Prevotella              | Akkermansia  | -1                   | Negative    |
| Prevotella            | Lachnospira  | -1                   | Negative    | Prevotella              | Lachnospira  | 1                    | Positive    |
| Prevotella            | Bacteroides  | -1                   | Negative    | Prevotella              | Sutterella   | 1                    | Positive    |
| Ruminococcus          | Prevotella   | -0.5                 | Negative    | Sutterella              | Prevotella   | 1                    | Positive    |
| Ruminococcus          | Akkermansia  | 0.5                  | Positive    | Sutterella              | Akkermansia  | -1                   | Negative    |
| Ruminococcus          | Odoribacter  | -0.5                 | Negative    | Sutterella              | Lachnospira  | -0.6                 | Negative    |
| Ruminococcus          | Bacteroides  | -1                   | Negative    | Sutterella              | Rikenella    | -1                   | Negative    |
| Ruminococcus          | Oscillospira | -1                   | Negative    | Sutterella              | Oscillospira | 1                    | Positive    |
| Ruminococcus          | Rikenella    | -1                   | Negative    | Akkermansia             | Prevotella   | -1                   | Negative    |
| Bacteroides           | Prevotella   | -1                   | Negative    | Akkermansia             | Sutterella   | -1                   | Negative    |
| Bacteroides           | Ruminococcus | -1                   | Negative    | Akkermansia             | Rikenella    | 1                    | Positive    |
| Bacteroides           | Rikenella    | 0.6                  | Positive    | Akkermansia             | Lachnospira  | -0.6                 | Negative    |
| Bacteroides           | Odoribacter  | -0.5                 | Negative    | Akkermansia             | Oscillospira | -0.6                 | Negative    |
| Bacteroides           | Lachnospira  | 1                    | Positive    | Lachnospira             | Akkermansia  | -0.6                 | Negative    |
| Bacteroides           | Akkermansia  | -0.3                 | Negative    | Lachnospira             | Prevotella   | 1                    | Positive    |
| Akkermansia           | Bacteroides  | -0.3                 | Negative    | Lachnospira             | Sutterella   | -0.6                 | Negative    |
| Akkermansia           | Ruminococcus | 0.5                  | Positive    | Lachnospira             | Oscillospira | -1                   | Negative    |
| Akkermansia           | Prevotella   | -0.3                 | Negative    | Oscillospira            | Lachnospira  | -1                   | Negative    |
| Akkermansia           | Odoribacter  | -0.3                 | Negative    | Oscillospira            | Prevotella   | 1                    | Positive    |
| Akkermansia           | Rikenella    | -0.5                 | Negative    | Oscillospira            | Sutterella   | -0.6                 | Negative    |
| Akkermansia           | Lachnospira  | 1                    | Positive    | Oscillospira            | Akkermansia  | -0.6                 | Negative    |
| Lachnospira           | Akkermansia  | 1                    | Positive    | Oscillospira            | Rikenella    | -1                   | Negative    |
| Lachnospira           | Rikenella    | -1                   | Negative    | Rikenella               | Oscillospira | -1                   | Negative    |
| Lachnospira           | Prevotella   | -1                   | Negative    | Rikenella               | Prevotella   | -1                   | Negative    |
| Lachnospira           | Bacteroides  | 1                    | Positive    | Rikenella               | Sutterella   | -1                   | Negative    |

|                               |                 |      |          |                                 |                     |      |          |
|-------------------------------|-----------------|------|----------|---------------------------------|---------------------|------|----------|
| Lachnospira                   | Odoribacter     | 0.6  | Positive | Rikenella                       | Lachnospira         | -1   | Negative |
| Odoribacter                   | Lachnospira     | 0.6  | Positive | Rikenella                       | Akkermansia         | 1    | Positive |
| Odoribacter                   | Akkermansia     | -0.3 | Negative |                                 |                     |      |          |
| Odoribacter                   | Bacteroides     | -0.5 | Negative |                                 |                     |      |          |
| Odoribacter                   | Ruminococcus    | -0.5 | Negative |                                 |                     |      |          |
| Odoribacter                   | Rikenella       | 1    | Positive |                                 |                     |      |          |
| Odoribacter                   | Prevotella      | -0.3 | Negative |                                 |                     |      |          |
| Rikenella                     | Odoribacter     | 1    | Positive |                                 |                     |      |          |
| Rikenella                     | Lachnospira     | -1   | Negative |                                 |                     |      |          |
| Rikenella                     | Bacteroides     | 0.6  | Positive |                                 |                     |      |          |
| Rikenella                     | Ruminococcus    | -0.5 | Negative |                                 |                     |      |          |
| Rikenella                     | Prevotella      | 0.6  | Positive |                                 |                     |      |          |
| Rikenella                     | Akkermansia     | -0.3 | Negative |                                 |                     |      |          |
| Oscillospira                  | Ruminococcus    | -1   | Negative |                                 |                     |      |          |
| <b>Aging Control (Phylum)</b> |                 |      |          | <b>Aging Probiotic (Phylum)</b> |                     |      |          |
| Firmicutes                    | Bacteroidetes   | 1    | Positive | Firmicutes                      | Actinobacteria      | 1    | Positive |
| Firmicutes                    | Cyanobacteria   | -0.3 | Negative | Firmicutes                      | Proteobacteria      | -0.5 | Negative |
| Bacteroidetes                 | Cyanobacteria   | -0.3 | Negative | Firmicutes                      | Verrucomicrobi<br>a | -0.2 | Negative |
| Bacteroidetes                 | Firmicutes      | 1    | Positive | Firmicutes                      | Bacteroidetes       | -1   | Negative |
| Cyanobacteria                 | Firmicutes      | -0.3 | Negative | Bacteroidetes                   | Firmicutes          | -1   | Negative |
| Cyanobacteria                 | Bacteroidetes   | -0.3 | Negative | Bacteroidetes                   | Proteobacteria      | 0.5  | Positive |
| Cyanobacteria                 | Proteobacteria  | -0.5 | Negative | Bacteroidetes                   | Verrucomicrobi<br>a | 0.6  | Positive |
| Cyanobacteria                 | Verrucomicrobia | -0.1 | Negative | Bacteroidetes                   | Actinobacteria      | -0.2 | Negative |
| Verrucomicrobi<br>a           | Cyanobacteria   | -0.1 | Negative | Proteobacteria                  | Actinobacteria      | -0.2 | Negative |
| Verrucomicrobi<br>a           | Proteobacteria  | -0.1 | Negative | Proteobacteria                  | Firmicutes          | -0.5 | Negative |
| Proteobacteria                | Verrucomicrobia | -0.1 | Negative | Proteobacteria                  | Bacteroidetes       | 0.5  | Positive |
| Proteobacteria                | Cyanobacteria   | -0.5 | Negative | Proteobacteria                  | Verrucomicrobi<br>a | 0.6  | Positive |

|                              |               |                                    |                         |                                |                     |                                    |                    |
|------------------------------|---------------|------------------------------------|-------------------------|--------------------------------|---------------------|------------------------------------|--------------------|
|                              |               |                                    |                         | Verrucomicrobia                | Proteobacteria      | 0.6                                | Positive           |
|                              |               |                                    |                         | Verrucomicrobia                | Firmicutes          | -0.2                               | Negative           |
|                              |               |                                    |                         | Verrucomicrobia                | Bacteroidetes       | 0.6                                | Positive           |
|                              |               |                                    |                         | Verrucomicrobia                | Cyanobacteria       | 0.5                                | Positive           |
|                              |               |                                    |                         | Actinobacteria                 | Bacteroidetes       | -0.2                               | Negative           |
|                              |               |                                    |                         | Actinobacteria                 | Proteobacteria      | -0.2                               | Negative           |
|                              |               |                                    |                         | Actinobacteria                 | Firmicutes          | 1                                  | Positive           |
|                              |               |                                    |                         | Cyanobacteria                  | Verrucomicrobi<br>a | 0.5                                | Positive           |
| <b>Aging Control (Genus)</b> |               |                                    |                         | <b>Aging Probiotic (Genus)</b> |                     |                                    |                    |
| <b>Taxon1</b>                | <b>Taxon2</b> | <b>Correlation<br/>(p&lt;0.05)</b> | <b>Associatio<br/>n</b> | <b>Taxon1</b>                  | <b>Taxon2</b>       | <b>Correlation<br/>(p&lt;0.05)</b> | <b>Association</b> |
| Prevotella                   | Sutterella    | 1                                  | Positive                | Prevotella                     | Akkermansia         | 0.6                                | Positive           |
| Prevotella                   | Bacteroides   | -1                                 | Negative                | Prevotella                     | Oscillospira        | -1                                 | Negative           |
| Prevotella                   | Ruminococcus  | 0.6                                | Positive                | Prevotella                     | Ruminococcus        | -0.6                               | Negative           |
| Prevotella                   | Lactobacillus | -1                                 | Negative                | Prevotella                     | Lactobacillus       | -1                                 | Negative           |
| Prevotella                   | Lachnospira   | -0.4                               | Positive                | Prevotella                     | Lachnospira         | -0.5                               | Negative           |
| Prevotella                   | Rikenella     | 1                                  | Positive                | Prevotella                     | Rikenella           | -0.6                               | Negative           |
| Bacteroides                  | Prevotella    | -1                                 | Negative                | Akkermansia                    | Prevotella          | 0.6                                | Positive           |
| Bacteroides                  | Ruminococcus  | -0.5                               | Negative                | Akkermansia                    | Oscillospira        | -1                                 | Negative           |
| Bacteroides                  | Lactobacillus | 1                                  | Positive                | Akkermansia                    | Ruminococcus        | -0.3                               | Negative           |
| Bacteroides                  | Lachnospira   | 0.6                                | Positive                | Akkermansia                    | Lactobacillus       | -1                                 | Negative           |
| Bacteroides                  | Sutterella    | 0.5                                | Positive                | Akkermansia                    | Lachnospira         | -1                                 | Negative           |
| Bacteroides                  | Rikenella     | -1                                 | Negative                | Akkermansia                    | Rikenella           | -1                                 | Negative           |
| Lactobacillus                | Bacteroides   | 1                                  | Positive                | Ruminococcus                   | Lactobacillus       | 1                                  | Positive           |
| Lactobacillus                | Prevotella    | -1                                 | Negative                | Ruminococcus                   | Lachnospira         | 1                                  | Positive           |
| Lactobacillus                | Lachnospira   | -0.5                               | Negative                | Ruminococcus                   | Rikenella           | 0.6                                | Positive           |
| Lactobacillus                | Sutterella    | -0.3                               | Negative                | Ruminococcus                   | Prevotella          | -0.6                               | Negative           |
| Lactobacillus                | Ruminococcus  | 0.6                                | Positive                | Ruminococcus                   | Oscillospira        | 1                                  | Positive           |
| Sutterella                   | Lactobacillus | -0.3                               | Negative                | Ruminococcus                   | Prevotella          | -0.6                               | Negative           |
| Sutterella                   | Bacteroides   | 0.5                                | Positive                | Ruminococcus                   | Akkermansia         | -0.6                               | Negative           |

|              |               |      |          |               |               |      |          |
|--------------|---------------|------|----------|---------------|---------------|------|----------|
| Sutterella   | Prevotella    | 1    | Positive | Oscillospira  | Ruminococcus  | 1    | Positive |
| Sutterella   | Lachnospira   | -0.5 | Negative | Oscillospira  | Prevotella    | -1   | Negative |
| Sutterella   | Rikenella     | -1   | Negative | Oscillospira  | Akkermansia   | -1   | Negative |
| Sutterella   | Ruminococcus  | 0.5  | Positive | Oscillospira  | Lactobacillus | 1    | Positive |
| Lachnospira  | Sutterella    | -0.5 | Negative | Oscillospira  | Lachnospira   | 1    | Positive |
| Lachnospira  | Lactobacillus | -0.5 | Negative | Oscillospira  | Rikenella     | 0.6  | Positive |
| Lachnospira  | Bacteroides   | 0.6  | Positive | Rikenella     | Oscillospira  | 0.6  | Positive |
| Lachnospira  | Prevotella    | -0.4 | Positive | Rikenella     | Ruminococcus  | 0.6  | Positive |
| Lachnospira  | Ruminococcus  | -0.6 | Negative | Rikenella     | Prevotella    | -0.6 | Negative |
| Ruminococcus | Lachnospira   | -0.6 | Negative | Rikenella     | Akkermansia   | -1   | Negative |
| Ruminococcus | Lactobacillus | 0.6  | Positive | Rikenella     | Lactobacillus | 1    | Positive |
| Ruminococcus | Bacteroides   | -0.5 | Negative | Rikenella     | Lachnospira   | 1    | Positive |
| Ruminococcus | Prevotella    | 0.6  | Positive | Lactobacillus | Rikenella     | 1    | Positive |
| Ruminococcus | Sutterella    | 0.5  | Positive | Lactobacillus | Oscillospira  | 1    | Positive |
| Rikenella    | Sutterella    | -1   | Negative | Lactobacillus | Ruminococcus  | 1    | Positive |
| Rikenella    | Bacteroides   | -1   | Negative | Lactobacillus | Akkermansia   | -1   | Negative |
| Rikenella    | Prevotella    | 1    | Positive | Lactobacillus | Prevotella    | -0.5 | Positive |
|              |               |      |          | Lactobacillus | Lachnospira   | 1    | Positive |
|              |               |      |          | Lachnospira   | Lactobacillus | 1    | Positive |
|              |               |      |          | Lachnospira   | Rikenella     | 1    | Positive |
|              |               |      |          | Lachnospira   | Oscillospira  | 1    | Positive |
|              |               |      |          | Lachnospira   | Ruminococcus  | 1    | Positive |
|              |               |      |          | Lachnospira   | Akkermansia   | -1   | Negative |
|              |               |      |          | Lachnospira   | Prevotella    | -0.5 | Positive |

**Table S4:** Summary of cecal microbiome co-occurrences between young and aging mice at phylum and genus levels based on Kendall's Tau correlation analysis after which FDR ( $q < 0.05$ ) correction was performed.

| Young Control (Phylum) |                 |                      |             | Young Probiotic (Phylum) |                 |                      |             |
|------------------------|-----------------|----------------------|-------------|--------------------------|-----------------|----------------------|-------------|
| Taxon1                 | Taxon2          | Correlation (p<0.05) | Association | Taxon1                   | Taxon2          | Correlation (p<0.05) | Association |
| Firmicutes             | Bacteroidetes   | -1                   | Negative    | Firmicutes               | Bacteroidetes   | 1                    | Positive    |
| Firmicutes             | Cyanobacteria   | -0.5                 | Negative    | Firmicutes               | Cyanobacteria   | -0.5                 | Negative    |
| Firmicutes             | Verrucomicrobia | -0.6                 | Negative    | Firmicutes               | Verrucomicrobia | 0.6                  | Positive    |
| Firmicutes             | Proteobacteria  | -0.3                 | Negative    | Firmicutes               | Actinobacteria  | -0.3                 | Negative    |
| Proteobacteria         | Firmicutes      | -0.3                 | Negative    | Actinobacteria           | Firmicutes      | -0.3                 | Negative    |
| Proteobacteria         | Bacteroidetes   | 1                    | Positive    | Actinobacteria           | Bacteroidetes   | -0.2                 | Negative    |
| Proteobacteria         | Cyanobacteria   | 0.6                  | Positive    | Actinobacteria           | Proteobacteria  | -0.5                 | Negative    |
| Cyanobacteria          | Verrucomicrobia | 0.5                  | Positive    | Actinobacteria           | Verrucomicrobia | -0.4                 | Negative    |
| Cyanobacteria          | Proteobacteria  | 0.4                  | Positive    | Verrucomicrobia          | Actinobacteria  | -0.4                 | Negative    |
| Cyanobacteria          | Firmicutes      | -0.5                 | Negative    | Verrucomicrobia          | Firmicutes      | 0.3                  | Positive    |
| Cyanobacteria          | Bacteroidetes   | 1                    | Positive    | Verrucomicrobia          | Bacteroidetes   | 1                    | Positive    |
| Bacteroidetes          | Cyanobacteria   | 1                    | Positive    | Verrucomicrobia          | Cyanobacteria   | -1                   | Negative    |
| Bacteroidetes          | Proteobacteria  | 1                    | Positive    | Verrucomicrobia          | Proteobacteria  | -0.4                 | Negative    |
| Bacteroidetes          | Firmicutes      | -1                   | Negative    | Proteobacteria           | Verrucomicrobia | -0.6                 | Negative    |
| Bacteroidetes          | Verrucomicrobia | -0.5                 | Negative    | Proteobacteria           | Actinobacteria  | -0.5                 | Negative    |
| Verrucomicrobia        | Bacteroidetes   | -0.5                 | Negative    | Proteobacteria           | Cyanobacteria   | -0.3                 | Negative    |
| Verrucomicrobia        | Firmicutes      | -0.6                 | Negative    | Cyanobacteria            | Proteobacteria  | -0.3                 | Negative    |
| Verrucomicrobia        | Cyanobacteria   | 0.5                  | Positive    | Cyanobacteria            | Firmicutes      | -0.3                 | Negative    |
|                        |                 |                      |             | Cyanobacteria            | Verrucomicrobia | -1                   | Negative    |
|                        |                 |                      |             | Cyanobacteria            | Bacteroidetes   | 1                    | Positive    |

|                              |               |                                |                    | Bacteroidetes                  | Cyanobacteria   | -1                             | Negative           |
|------------------------------|---------------|--------------------------------|--------------------|--------------------------------|-----------------|--------------------------------|--------------------|
|                              |               |                                |                    | Bacteroidetes                  | Verrucomicrobia | -1                             | Negative           |
|                              |               |                                |                    | Bacteroidetes                  | Actinobacteria  | -0.2                           | Negative           |
|                              |               |                                |                    | Bacteroidetes                  | Firmicutes      | 0.3                            | Positive           |
| <b>Young Control (Genus)</b> |               |                                |                    | <b>Young Probiotic (Genus)</b> |                 |                                |                    |
| <b>Taxon1</b>                | <b>Taxon2</b> | <b>Correlation (p&lt;0.05)</b> | <b>Association</b> | <b>Taxon1</b>                  | <b>Taxon2</b>   | <b>Correlation (p&lt;0.05)</b> | <b>Association</b> |
| Prevotella                   | Oscillospira  | 0.6                            | Positive           | Prevotella                     | Oscillospira    | 0.6                            | Positive           |
| Prevotella                   | Akkermansia   | -0.5                           | Negative           | Prevotella                     | Akkermansia     | -0.5                           | Negative           |
| Prevotella                   | Lachnospira   | -1                             | Negative           | Prevotella                     | Lachnospira     | 1                              | Positive           |
| Prevotella                   | Sutterella    | -0.4                           | Negative           | Prevotella                     | Sutterella      | 0.4                            | Positive           |
| Prevotella                   | Bacteroides   | -1                             | Negative           | Prevotella                     | Lactobacillus   | 0.4                            | Positive           |
| Bacteroides                  | Prevotella    | -1                             | Negative           | Prevotella                     | odoribacteria   | 0.6                            | Positive           |
| Bacteroides                  | Oscillospira  | -0.6                           | Negative           | Prevotella                     | Rikenella       | -1                             | Negative           |
| Bacteroides                  | Rikenella     | 0.6                            | Positive           | Prevotella                     | Ruminococcus    | 1                              | Positive           |
| Bacteroides                  | Lachnospira   | 1                              | Positive           | Prevotella                     | Bacteroides     | 1                              | Positive           |
| Bacteroides                  | Sutterella    | -0.3                           | Negative           | Bacteroides                    | Prevotella      | 1                              | Positive           |
| Bacteroides                  | Ruminococcus  | -0.6                           | Negative           | Bacteroides                    | Oscillospira    | -0.5                           | Negative           |
| Ruminococcus                 | Bacteroides   | -0.6                           | Negative           | Bacteroides                    | Akkermansia     | -0.5                           | Negative           |
| Ruminococcus                 | Akkermansia   | 0.5                            | Positive           | Bacteroides                    | Lachnospira     | 1                              | Positive           |
| Ruminococcus                 | Sutterella    | 0.6                            | Positive           | Bacteroides                    | Sutterella      | 0.6                            | Positive           |
| Ruminococcus                 | Lachnospira   | -1                             | Negative           | Bacteroides                    | Lactobacillus   | 0.4                            | Positive           |
| Lachnospira                  | Ruminococcus  | -1                             | Negative           | Bacteroides                    | odoribacteria   | -0.4                           | Negative           |
| Lachnospira                  | Bacteroides   | 1                              | Positive           | Bacteroides                    | Rikenella       | -1                             | Negative           |
| Lachnospira                  | Prevotella    | -1                             | Negative           | Rikenella                      | Bacteroides     | -1                             | Negative           |
| Lachnospira                  | Oscillospira  | -0.6                           | Negative           | Rikenella                      | Prevotella      | -1                             | Negative           |
| Oscillospira                 | Lachnospira   | -0.6                           | Negative           | Rikenella                      | Oscillospira    | -0.4                           | Negative           |
| Oscillospira                 | Prevotella    | 0.6                            | Positive           | Rikenella                      | Odoribacteria   | -0.5                           | Negative           |
| Oscillospira                 | Bacteroides   | -0.6                           | Negative           | Rikenella                      | Lachnospira     | 1                              | Positive           |
| Oscillospira                 | Sutterella    | -0.3                           | Negative           | Rikenella                      | Sutterella      | 0.5                            | Positive           |

|              |              |      |          |               |               |      |          |
|--------------|--------------|------|----------|---------------|---------------|------|----------|
| Oscillospira | Akkermansia  | -0.6 | Negative | Rikenella     | Ruminococcus  | -0.6 | Negative |
| Akkermansia  | Oscillospira | -0.6 | Negative | Rikenella     | Lactobacillus | -0.4 | Negative |
| Akkermansia  | Ruminococcus | 0.5  | Positive | Lactobacillus | Rikenella     | -0.4 | Negative |
| Akkermansia  | Prevotella   | -0.5 | Negative | Lactobacillus | Prevotella    | 0.4  | Positive |
| Akkermansia  | Sutterella   | 0.6  | Positive | Lactobacillus | Bacteroides   | 0.4  | Positive |
| Sutterella   | Akkermansia  | 0.6  | Positive | Lactobacillus | Ruminococcus  | 0.6  | Positive |
| Sutterella   | Oscillospira | -0.3 | Negative | Lactobacillus | Akkermansia   | -0.5 | Negative |
| Sutterella   | Ruminococcus | 0.6  | Positive | Lactobacillus | Lachnospira   | -1   | Negative |
| Sutterella   | Bacteroides  | -0.3 | Negative | Lactobacillus | Odoribacteria | -0.6 | Negative |
|              |              |      |          | Lactobacillus | Oscillospira  | 0.4  | Positive |
|              |              |      |          | Lactobacillus | Sutterella    | 0.5  | Positive |
| Sutterella   | Prevotella   | -0.4 | Negative | Odoribacteria | Lactobacillus | -0.6 | Negative |
| Sutterella   | Rikenella    | -0.6 | Negative | Odoribacteria | Ruminococcus  | 0.6  | Positive |
| Rikenella    | Sutterella   | -0.6 | Negative | Odoribacteria | Rikenella     | -0.5 | Negative |
| Rikenella    | Bacteroides  | 0.6  | Positive | Odoribacteria | Prevotella    | 0.6  | Positive |
|              |              |      |          | Odoribacteria | Bacteroides   | -0.4 | Negative |
|              |              |      |          | Odoribacteria | Sutterella    | -0.5 | Negative |
|              |              |      |          | Odoribacteria | Lachnospira   | 1    | Positive |
|              |              |      |          | Lachnospira   | Odoribacteria | 1    | Positive |
|              |              |      |          | Lachnospira   | Rikenella     | 1    | Positive |
|              |              |      |          | Lachnospira   | Prevotella    | 1    | Positive |
|              |              |      |          | Lachnospira   | Bacteroides   | 1    | Positive |
|              |              |      |          | Lachnospira   | Lactobacillus | -1   | Negative |
|              |              |      |          | Lachnospira   | Oscillospira  | 1    | Positive |
|              |              |      |          | Lachnospira   | Sutterella    | 0.6  | Positive |
|              |              |      |          | Lachnospira   | Ruminococcus  | 0.6  | Positive |
|              |              |      |          | Ruminococcus  | Lachnospira   | 0.6  | Positive |
|              |              |      |          | Ruminococcus  | Odoribacteria | 0.6  | Positive |
|              |              |      |          | Ruminococcus  | Lactobacillus | 0.6  | Positive |
|              |              |      |          | Ruminococcus  | Rikenella     | -0.6 | Negative |
|              |              |      |          | Ruminococcus  | Prevotella    | 1    | Positive |

|                        |                |                                    |                    |                          |                |                                    |                    |
|------------------------|----------------|------------------------------------|--------------------|--------------------------|----------------|------------------------------------|--------------------|
|                        |                |                                    |                    | Ruminococcus             | Oscillospira   | 1                                  | Positive           |
|                        |                |                                    |                    | Ruminococcus             | Akkermansia    | -1                                 | Negative           |
|                        |                |                                    |                    | Akkermansia              | Ruminococcus   | -1                                 | Negative           |
|                        |                |                                    |                    | Akkermansia              | Prevotella     | -0.5                               | Negative           |
|                        |                |                                    |                    | Akkermansia              | Suterella      | -0.5                               | Negative           |
|                        |                |                                    |                    | Akkermansia              | Lactobacillus  | -0.5                               | Negative           |
|                        |                |                                    |                    | Akkermansia              | Bacteroides    | -0.5                               | Negative           |
|                        |                |                                    |                    | Akkermansia              | Oscillospira   | 1                                  | Positive           |
|                        |                |                                    |                    | Oscillospira             | Akkermansia    | 1                                  | Positive           |
|                        |                |                                    |                    | Oscillospira             | Prevotella     | 0.6                                | Positive           |
|                        |                |                                    |                    | Oscillospira             | Bacteroides    | -0.5                               | Negative           |
|                        |                |                                    |                    | Oscillospira             | Rikenella      | -0.4                               | Negative           |
|                        |                |                                    |                    | Oscillospira             | Lactobacillus  | 0.4                                | Positive           |
|                        |                |                                    |                    | Oscillospira             | Lachnospira    | 1                                  | Positive           |
|                        |                |                                    |                    | Oscillospira             | Ruminococcus   | 1                                  | Positive           |
|                        |                |                                    |                    | Oscillospira             | Akkermansia    | 1                                  | Positive           |
|                        |                |                                    |                    | Oscillospira             | Sutterella     | -0.5                               | Negative           |
|                        |                |                                    |                    | Sutterella               | Oscillospira   | -0.5                               | Negative           |
|                        |                |                                    |                    | Sutterella               | Akkermansia    | -0.5                               | Negative           |
|                        |                |                                    |                    | Sutterella               | Lachnospira    | 0.6                                | Positive           |
|                        |                |                                    |                    | Sutterella               | Rikenella      | 0.5                                | Positive           |
|                        |                |                                    |                    | Sutterella               | Bacteroides    | 0.6                                | Positive           |
|                        |                |                                    |                    | Sutterella               | Prevotella     | 0.4                                | Positive           |
|                        |                |                                    |                    | Sutterella               | Odoribacteria  | -0.5                               | Negative           |
|                        |                |                                    |                    | Sutterella               | Lactobacillus  | 0.5                                | Positive           |
| Aging Control (Phylum) |                |                                    |                    | Aging Probiotic (Phylum) |                |                                    |                    |
| <b>Taxon1</b>          | <b>Taxon2</b>  | <b>Correlation<br/>(p&lt;0.05)</b> | <b>Association</b> | <b>Taxon1</b>            | <b>Taxon2</b>  | <b>Correlation<br/>(p&lt;0.05)</b> | <b>Association</b> |
| Firmicutes             | Actinobacteria | 1                                  | Positive           | Firmicutes               | Bacteroidetes  | 1                                  | Positive           |
| Firmicutes             | Bacteroidetes  | -1                                 | Negative           | Firmicutes               | Proteobacteria | 0.6                                | Positive           |



|                 |                 |      |          |                 |                 |      |          |
|-----------------|-----------------|------|----------|-----------------|-----------------|------|----------|
| Firmicutes      | Verrucomicrobia | -0.3 | Negative | Firmicutes      | Cyanobacteria   | -0.5 | Negative |
| Bacteroidetes   | Firmicutes      | -1   | Negative | Firmicutes      | Verrucomicrobia | 0.6  | Positive |
| Bacteroidetes   | Actinobacteria  | -0.3 | Negative | Firmicutes      | Actinobacteria  | -0.3 | Negative |
| Bacteroidetes   | Verrucomicrobia | 0.5  | Positive | Bacteroidetes   | Firmicutes      | 1    | Positive |
| Verrucomicrobia | Bacteroidetes   | 0.5  | Positive | Bacteroidetes   | Proteobacteria  | 0.5  | Positive |
| Verrucomicrobia | Firmicutes      | -0.3 | Negative | Bacteroidetes   | Cyanobacteria   | -0.5 | Negative |
| Verrucomicrobia | Proteobacteria  | 0.6  | Positive | Bacteroidetes   | Verrucomicrobia | 0.6  | Positive |
| Verrucomicrobia | Actinobacteria  | -0.5 | Negative | Bacteroidetes   | Actinobacteria  | -0.2 | Negative |
| Actinobacteria  | Verrucomicrobia | -0.5 | Negative | Actinobacteria  | Bacteroidetes   | -0.2 | Negative |
| Actinobacteria  | Firmicutes      | 1    | Positive | Actinobacteria  | Firmicutes      | -0.3 | Negative |
| Actinobacteria  | Bacteroidetes   | -0.3 | Negative | Actinobacteria  | Proteobacteria  | -0.5 | Negative |
| Actinobacteria  | Proteobacteria  | -0.3 | Negative | Actinobacteria  | Cyanobacteria   | -0.5 | Negative |
| Proteobacteria  | Actinobacteria  | -0.3 | Negative | Actinobacteria  | Verrucomicrobia | -0.6 | Negative |
| Proteobacteria  | Verrucomicrobia | 0.6  | Positive | Verrucomicrobia | Actinobacteria  | -0.6 | Negative |
|                 |                 |      |          | Verrucomicrobia | Bacteroidetes   | 0.6  | Positive |
|                 |                 |      |          | Verrucomicrobia | Firmicutes      | 0.6  | Positive |
|                 |                 |      |          | Verrucomicrobia | Proteobacteria  | -0.5 | Negative |
|                 |                 |      |          | Verrucomicrobia | Cyanobacteria   | -0.5 | Negative |
|                 |                 |      |          | Cyanobacteria   | Verrucomicrobia | -0.5 | Negative |
|                 |                 |      |          | Cyanobacteria   | Actinobacteria  | -0.5 | Negative |
|                 |                 |      |          | Cyanobacteria   | Bacteroidetes   | -0.5 | Negative |
|                 |                 |      |          | Cyanobacteria   | Firmicutes      | -0.5 | Negative |
|                 |                 |      |          | Cyanobacteria   | Proteobacteria  | -0.3 | Negative |
|                 |                 |      |          | Proteobacteria  | Cyanobacteria   | -0.3 | Negative |
|                 |                 |      |          | Proteobacteria  | Verrucomicrobia | -0.5 | Negative |

|                       |              |                      |             | Proteobacteria          | Actinobacteria | -0.5                 | Negative    |
|-----------------------|--------------|----------------------|-------------|-------------------------|----------------|----------------------|-------------|
|                       |              |                      |             | Proteobacteria          | Bacteroidetes  | 0.5                  | Positive    |
|                       |              |                      |             | Proteobacteria          | Firmicutes     | 0.6                  | Positive    |
| Aging Control (Genus) |              |                      |             | Aging Probiotic (Genus) |                |                      |             |
| Taxon1                | Taxon2       | Correlation (p<0.05) | Association | Taxon1                  | Taxon2         | Correlation (p<0.05) | Association |
| Prevotella            | Rikenella    | 1                    | Positive    | Prevotella              | Rikenella      | -1                   | Negative    |
| Prevotella            | Sutterella   | -0.6                 | Negative    | Prevotella              | Sutterella     | -0.6                 | Negative    |
| Prevotella            | Lachnospira  | -1                   | Negative    | Prevotella              | Lachnospira    | 1                    | Positive    |
| Prevotella            | Oscillospira | -1                   | Negative    | Prevotella              | Oscillospira   | 1                    | Positive    |
| Prevotella            | Bacteroides  | -0.5                 | Negative    | Prevotella              | Bacteroides    | -0.5                 | Negative    |
| Bacteroides           | Prevotella   | -0.5                 | Negative    | Prevotella              | Ruminococcus   | -1                   | Negative    |
| Bacteroides           | Sutterella   | 1                    | Positive    | Prevotella              | Lactobacillus  | 1                    | Positive    |
| Bacteroides           | Oscillospira | -1                   | Negative    | Lactobacillus           | Prevotella     | 1                    | Positive    |
| Bacteroides           | Lachnospira  | 1                    | Positive    | Lactobacillus           | Rikenella      | -0.6                 | Negative    |
| Lachnospira           | Bacteroides  | 1                    | Positive    | Lactobacillus           | Sutterella     | -0.4                 | Negative    |
| Lachnospira           | Sutterella   | -0.6                 | Negative    | Lactobacillus           | Dorea          | -0.8                 | Negative    |
| Lachnospira           | Prevotella   | -1                   | Negative    | Lactobacillus           | Oscillospira   | 0.6                  | Positive    |
| Lachnospira           | Rikenella    | 1                    | Positive    | Lactobacillus           | Bacteroides    | -0.5                 | Negative    |
| Lachnospira           | Oscillospira | 1                    | Positive    | Lactobacillus           | Ruminococcus   | -1                   | Negative    |
| Oscillospira          | Lachnospira  | 1                    | Positive    | Ruminococcus            | Lactobacillus  | -1                   | Negative    |
| Oscillospira          | Prevotella   | -1                   | Negative    | Ruminococcus            | Prevotella     | -1                   | Negative    |
| Oscillospira          | Bacteroides  | -1                   | Negative    | Ruminococcus            | Rikenella      | 0.5                  | Positive    |
| Oscillospira          | Sutterella   | 1                    | Positive    | Ruminococcus            | Sutterella     | -0.3                 | Negative    |
| Oscillospira          | Rikenella    | -1                   | Negative    | Ruminococcus            | Dorea          | 0.6                  | Positive    |
| Rikenella             | Oscillospira | -1                   | Negative    | Ruminococcus            | Oscillospira   | -0.5                 | Negative    |
| Rikenella             | Prevotella   | 1                    | Positive    | Ruminococcus            | Bacteroides    | 0.6                  | Positive    |
| Rikenella             | Lachnospira  | 1                    | Positive    | Ruminococcus            | Lachnospira    | 0.8                  | Positive    |
| Rikenella             | Sutterella   | -0.6                 | Negative    | Lachnospira             | Ruminococcus   | 0.8                  | Positive    |
| Sutterella            | Rikenella    | -0.6                 | Negative    | Lachnospira             | Bacteroides    | -0.8                 | Negative    |

|            |              |      |          |              |               |      |          |
|------------|--------------|------|----------|--------------|---------------|------|----------|
| Sutterella | Oscillospira | 1    | Positive | Lachnospira  | Prevotella    | 1    | Positive |
| Sutterella | Prevotella   | -0.6 | Negative | Lachnospira  | Rikenella     | 0.6  | Positive |
| Sutterella | Lachnospira  | -0.6 | Negative | Lachnospira  | Sutterella    | -0.6 | Negative |
| Sutterella | Bacteroides  | 1    | Positive | Lachnospira  | Dorea         | -0.8 | Negative |
|            |              |      |          | Lachnospira  | Oscillospira  | -1   | Negative |
|            |              |      |          | Oscillospira | Lachnospira   | -1   | Negative |
|            |              |      |          | Oscillospira | Prevotella    | 1    | Positive |
|            |              |      |          | Oscillospira | Lactobacillus | 0.6  | Positive |
|            |              |      |          | Oscillospira | Ruminococcus  | -0.5 | Negative |
|            |              |      |          | Oscillospira | Dorea         | -0.4 | Negative |
|            |              |      |          | Oscillospira | Sutterella    | -0.8 | Negative |
|            |              |      |          | Oscillospira | Rikenella     | -1   | Negative |
|            |              |      |          | Oscillospira | Bacteroides   | -0.6 | Negative |
|            |              |      |          | Bacteroides  | Oscillospira  | -0.6 | Negative |
|            |              |      |          | Bacteroides  | Prevotella    | -0.5 | Negative |
|            |              |      |          | Bacteroides  | Lactobacillus | -0.5 | Negative |
|            |              |      |          | Bacteroides  | Ruminococcus  | 0.6  | Positive |
|            |              |      |          | Bacteroides  | Lachnospira   | -0.8 | Negative |
|            |              |      |          | Bacteroides  | Dorea         | 0.8  | Positive |
|            |              |      |          | Bacteroides  | Sutterella    | 0.8  | Positive |
|            |              |      |          | Bacteroides  | Rikenella     | 0.6  | Positive |
|            |              |      |          | Rikenella    | Bacteroides   | 0.6  | Positive |
|            |              |      |          | Rikenella    | Oscillospira  | -1   | Negative |
|            |              |      |          | Rikenella    | Prevotella    | -1   | Negative |
|            |              |      |          | Rikenella    | Lactobacillus | -0.6 | Negative |
|            |              |      |          | Rikenella    | Ruminococcus  | 0.5  | Positive |
|            |              |      |          | Rikenella    | Lachnospira   | 0.6  | Positive |
|            |              |      |          | Rikenella    | Dorea         | 0.6  | Positive |
|            |              |      |          | Rikenella    | Sutterella    | 0.8  | Positive |
|            |              |      |          | Sutterella   | Rikenella     | 0.8  | Positive |
|            |              |      |          | Sutterella   | Bacteroides   | 0.8  | Positive |
|            |              |      |          | Sutterella   | Oscillospira  | -0.8 | Negative |

|  |  |  |  |            |               |      |          |
|--|--|--|--|------------|---------------|------|----------|
|  |  |  |  | Sutterella | Prevotella    | -0.6 | Negative |
|  |  |  |  | Sutterella | Lactobacillus | -0.4 | Negative |
|  |  |  |  | Sutterella | Ruminococcus  | -0.3 | Negative |
|  |  |  |  | Sutterella | Lachnospira   | -0.6 | Negative |
|  |  |  |  | Sutterella | Dorea         | 0.6  | Positive |
|  |  |  |  | Dorea      | Sutterella    | 0.6  | Positive |
|  |  |  |  | Dorea      | Rikenella     | 0.6  | Positive |
|  |  |  |  | Dorea      | Bacteroides   | 0.8  | Positive |
|  |  |  |  | Dorea      | Oscillospira  | -0.4 | Negative |
|  |  |  |  | Dorea      | Lachnospira   | -0.8 | Negative |
|  |  |  |  | Dorea      | Lactobacillus | -0.8 | Negative |
|  |  |  |  | Dorea      | Ruminococcus  | 0.6  | Positive |

**Figure S1:** Bacterial taxa identified to be differentially abundant by linear discrimination analysis (LDA) effect size (LEfSe, log LDA > 2.0) analysis in all the 4 samples at phylum level (A) and genus level (B). The values are shown as the mean  $\pm$  SEM. \*Significant differences with  $p < 0.05$ .

**A**

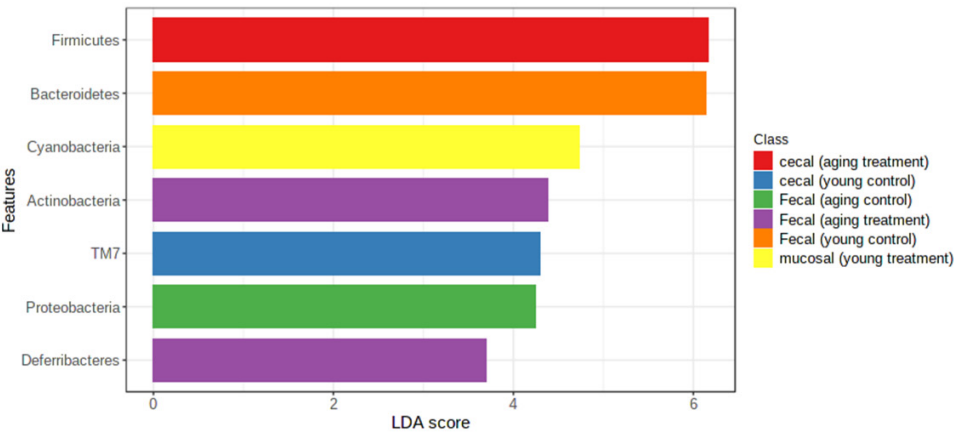

**B**

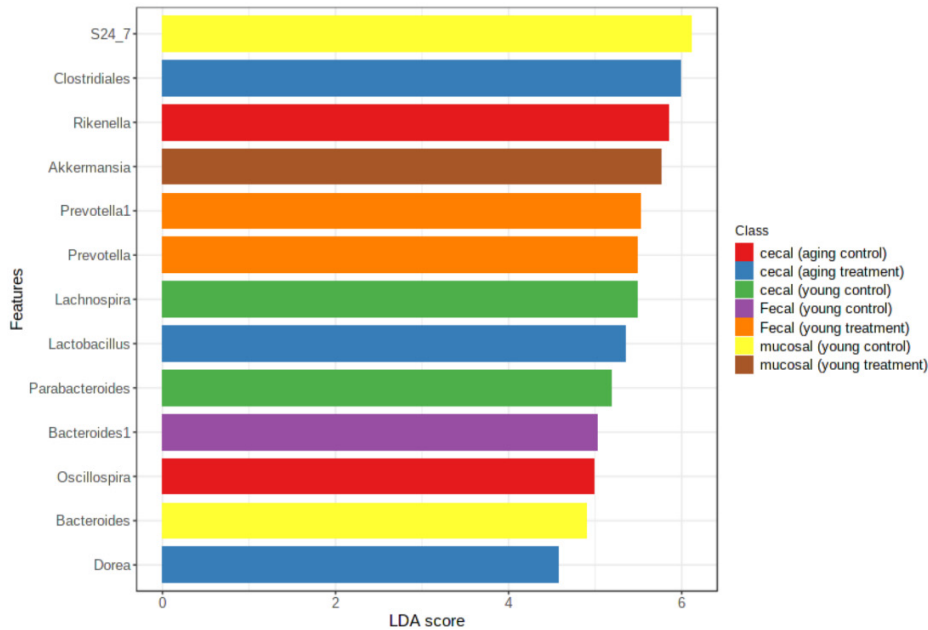

**Figure S2.** Summary of co-occurrences and co-exclusion analysis between young and aging mice at the phylum and genus levels in fecal (A-B) and mucosal (C-D) cecal (E-F). (YC) Young control group, (YP) young probiotic group, (AC) aging control group and (AP) aging probiotic group.

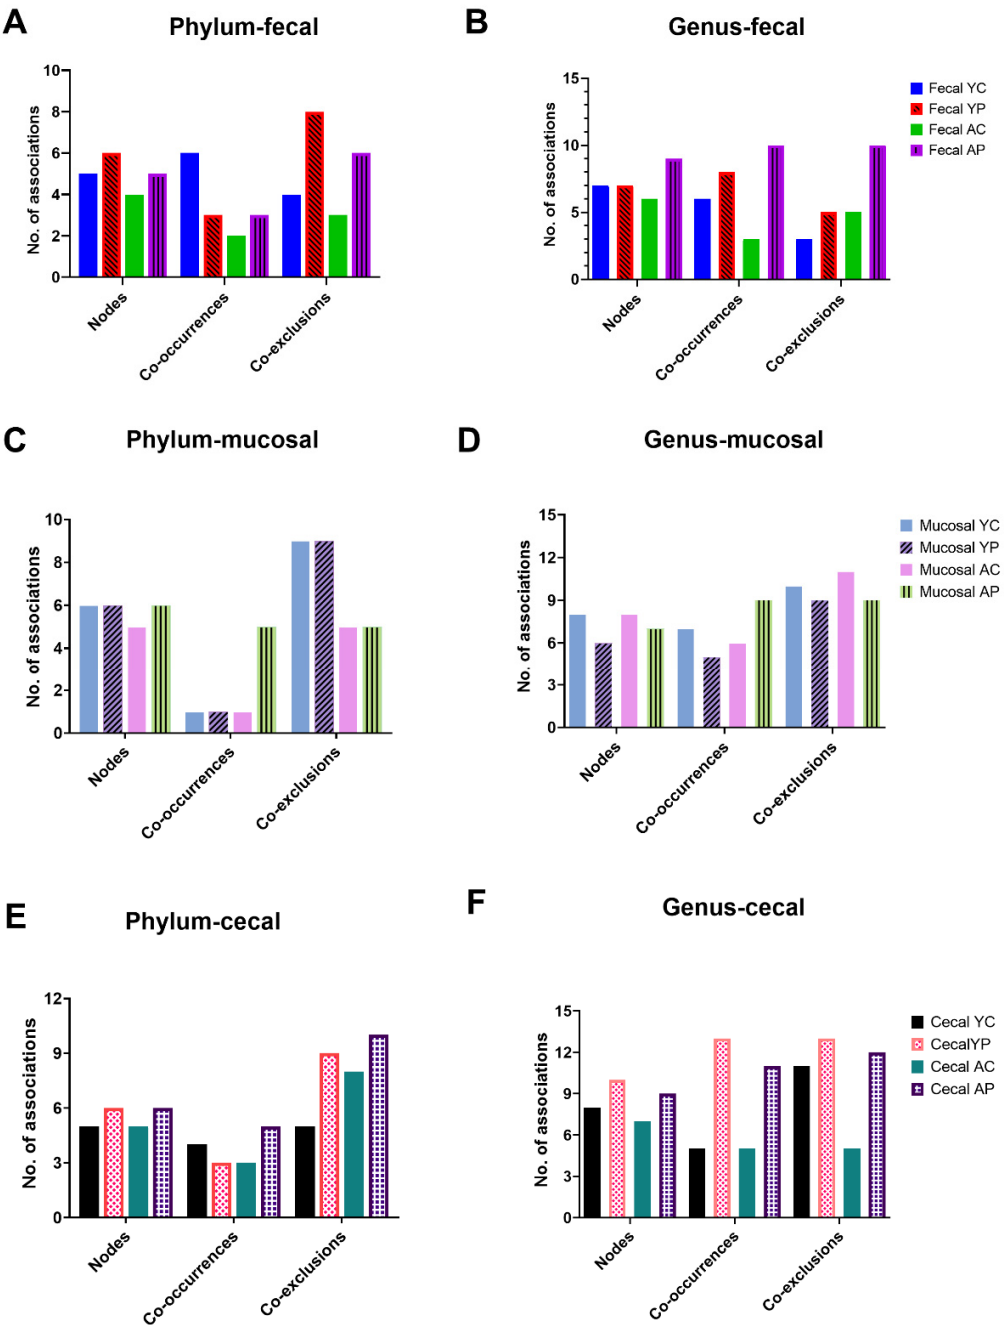

Supplement: s1 [file s1]
